# Supplementary material for: Chitosan-Dextran sulfate coated doxorubicin loaded PLGA-PVA-nanoparticles caused apoptosis in doxorubicin resistance breast cancer cells through induction of DNA damage
Source: PubMed Central journal article supplement (PMC5438340; doi:10.1038/s41598-017-02134-z), 2017-05-19
Supplement: 41598_2017_2134_MOESM1_ESM.pdf [file 41598_2017_2134_MOESM1_ESM.pdf]

**Chitosan-Dextran sulfate coated doxorubicin loaded PLGA-PVA- nanoparticles caused apoptosis in doxorubicin resistance breast cancer cells through induction of DNA damage.**

Sumit Siddharth<sup>1</sup>, Anmada Nayak<sup>1</sup>, Deepika Nayak<sup>1</sup>, Birendra Kumar Bindhani<sup>2\*</sup>, Chanakya Nath Kundu<sup>1\*</sup>

<sup>1</sup>Cancer Biology Division, KIIT School of Biotechnology, KIIT University, Campus-11, Patia, Bhubaneswar, Odisha, 751024, India.

<sup>2</sup> Plant Biotechnology and Nanotechnology Division, KIIT University, Campus-11, Patia, Bhubaneswar, Odisha, 751024, India.

**Short title:** Sensitivity of double coated DOX-NP against DOX resistance cancer cells.

**To whom correspondence should be addressed:** <sup>\*1</sup>Chanakya Nath Kundu, Cancer Biology Division, KIIT School of Biotechnology, KIIT University, Campus-11, Patia, Bhubaneswar, Orissa, 751024, India. Tel. : +91-0674-272-5466; Fax: +91-0674-272-5732; E-mail: [cnkundu@gmail.com](mailto:cnkundu@gmail.com) and Birendra Kumar Bindhani<sup>2\*</sup>, Plant Biotechnology and Nanotechnology Division, KIIT University, Campus-11, Patia, Bhubaneswar, Odisha, 751024, India. Tel. : +91-0674-272-5466; Fax: +91-0674-272-5732; E-mail: [drbindhani@gmail.com](mailto:drbindhani@gmail.com)

**Methods and material:**

- 1) It is confirmed that all methods were carried out in accordance with relevant guidelines and regulations.
- 2) In current MS we did not use any animal or human subject so Institutional ethical approval is not needed. All the experiment is carried out in in vitro cell culture system.
- 3) Original western blot has given below. We have provided different exposure of blot PARP-1. Lower exposure blot is used in the final MS.

Figure 5a

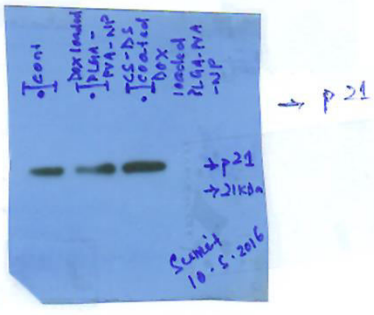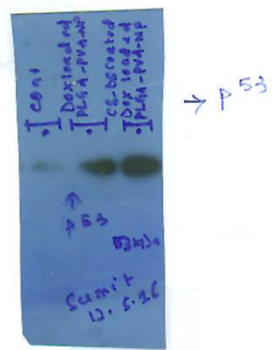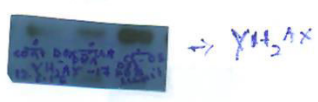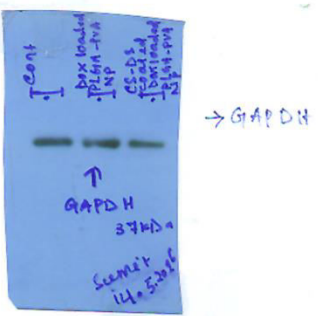

Figure 4c

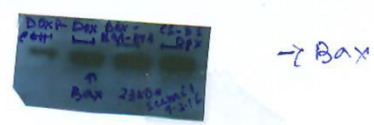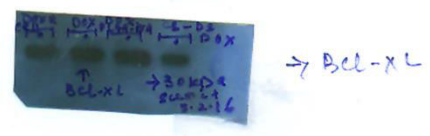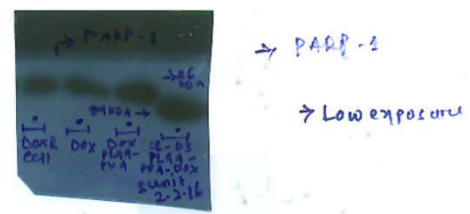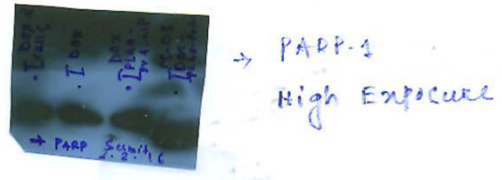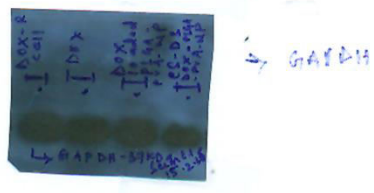

Figure: Original western blot images.
